# Supplementary material
Source: Royal Society of Chemistry journal article supplement (doi:10.1039/d5nj04703j)
Supplement: d5nj04703j1.pdf [file d5nj04703j1.pdf]

## **Electronic Supplementary Information (ESI)**

**Transmetalated synthesis of homodinuclear Mn<sup>II</sup> and Co<sup>II</sup> complexes containing Robson type macrocyclic ligands: crystal structure, magnetic investigation and DFT calculations**

**Abhishek Pramanik, Samit Majumder, Susanta Hazra and Sasankasekhar Mohanta\***

*Department of Chemistry, University of Calcutta, 92 A. P. C. Road, Kolkata 700009, India,  
E-mail: sm\_cu\_chem@yahoo.co.in; smchem@caluniv.ac.in.*

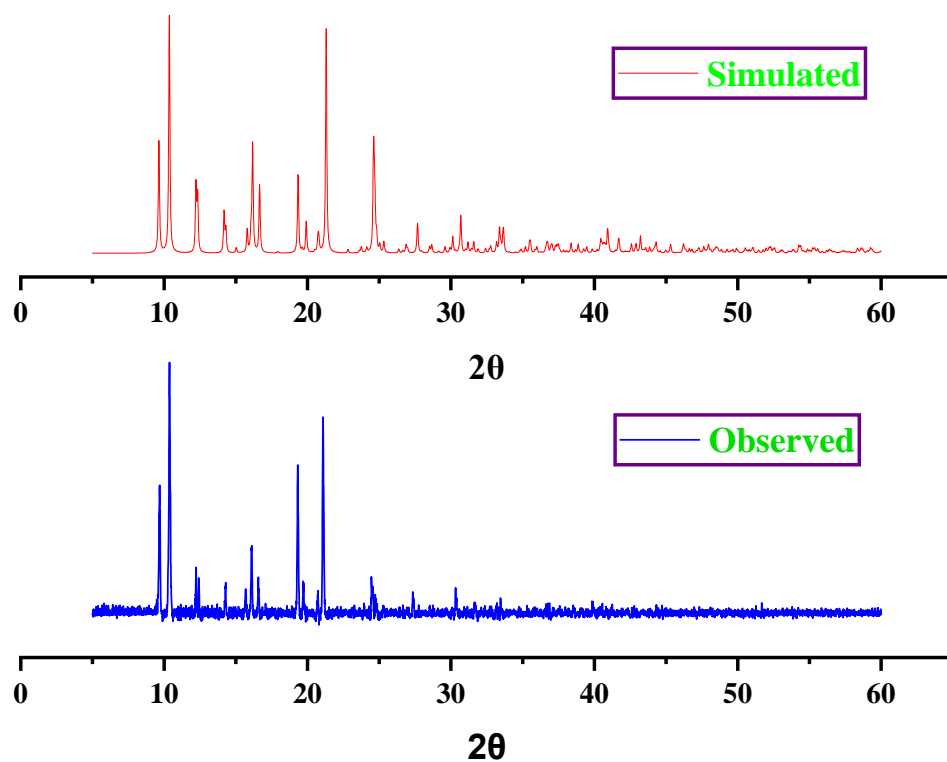

**Fig. S1.** Powder X-ray diffraction (PXRD) patterns of  $[\text{Mn}^{\text{II}}_2\text{L}^1\text{Cl}_2]$  (**1**).

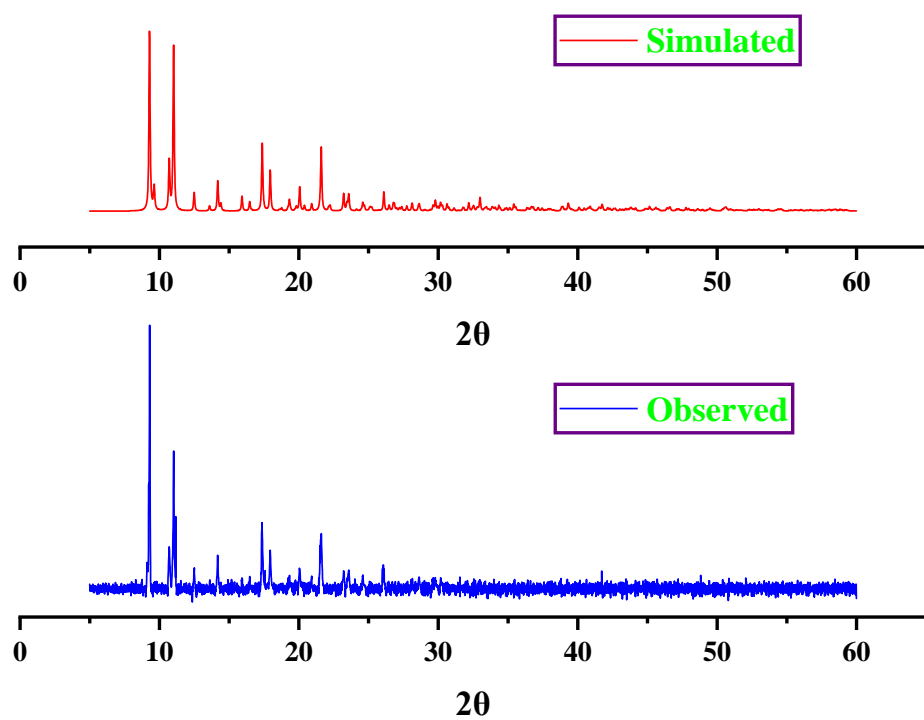

**Fig. S2.** Powder X-ray diffraction (PXRD) patterns of  $[\text{Co}^{\text{II}}_2\text{L}^2(\text{CH}_3\text{OH})(\text{H}_2\text{O})\text{Cl}](\text{NO}_3)$  (**2**).

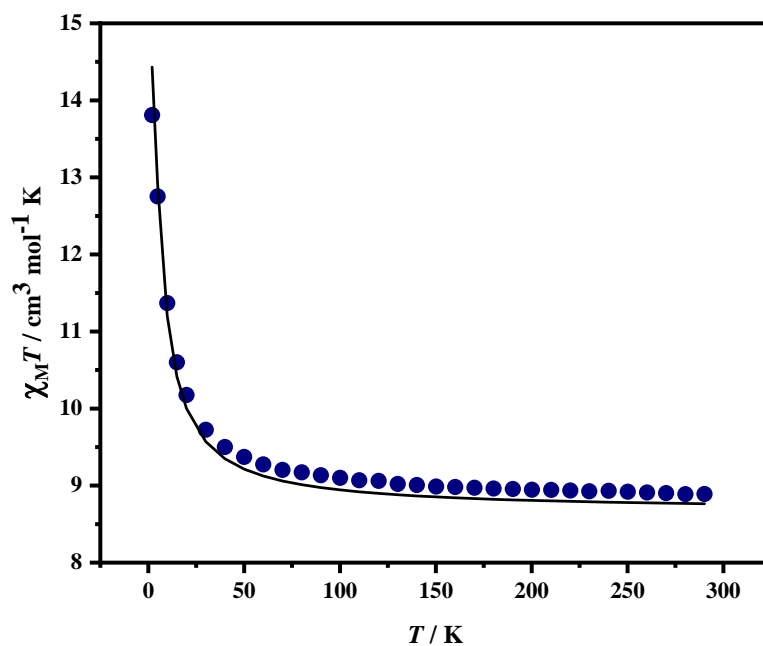

**Fig. S3.**  $\chi_M T$  versus  $T$  plot (at 0.1 T) for  $[\text{Mn}^{\text{II}}_2\text{L}^1\text{Cl}_2]$  (**1**). Symbols represent the experimental data while the solid line represents the simulated profile having  $J = 0.377 \text{ cm}^{-1}$ ,  $g = 1.990$  and residual ( $R$ ) =  $2.09 \times 10^{-1}$ .

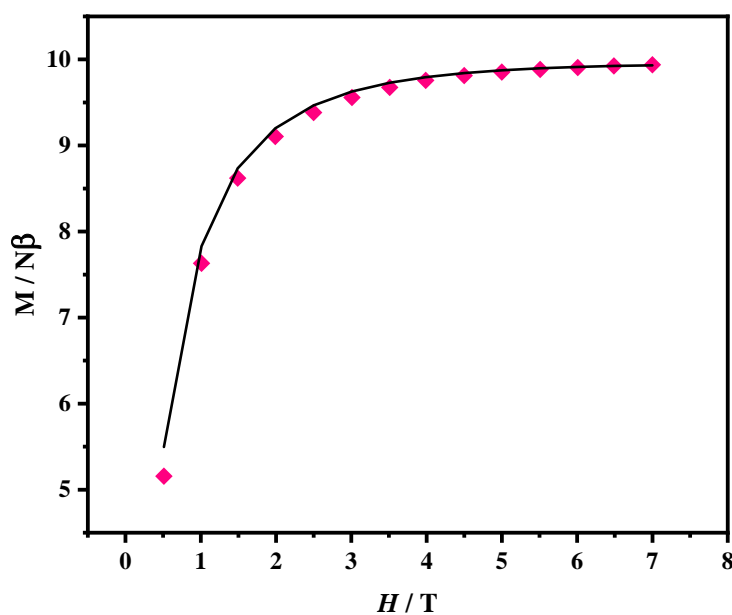

**Fig. S4.** Magnetization versus field plot (at 2 K) for  $[\text{Mn}^{\text{II}}_2\text{L}^1\text{Cl}_2]$  (**1**). Symbols represent the experimental data while the solid line represents the simulated profile having  $J = 0.377 \text{ cm}^{-1}$ ,  $g = 1.990$  and residual ( $R$ ) =  $2.09 \times 10^{-1}$ .

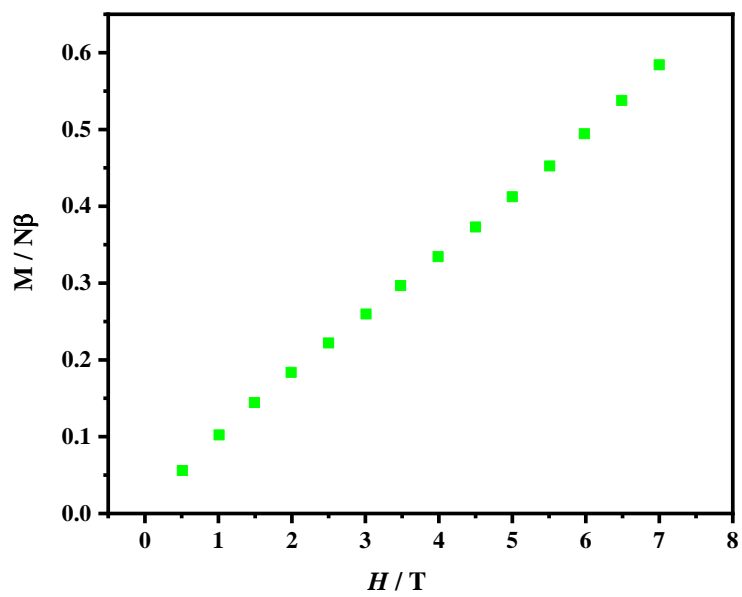

**Fig. S5.** Experimental magnetization versus field plot (at 2 K) for  $[\text{Co}^{\text{II}}_2\text{L}^2(\text{CH}_3\text{OH})(\text{H}_2\text{O})\text{Cl}](\text{NO}_3)$  (**2**).

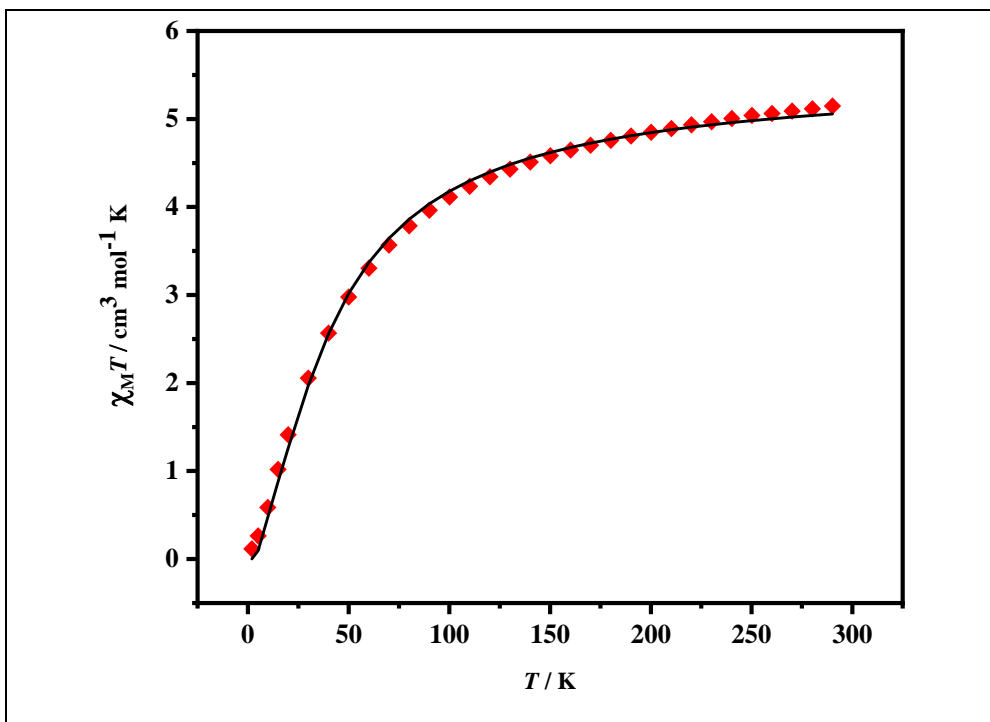

**Fig. S6.**  $\chi_M T$  versus  $T$  plot (at 1 T) for  $[\text{Co}^{\text{II}}_2\text{L}^2(\text{CH}_3\text{OH})(\text{H}_2\text{O})\text{Cl}](\text{NO}_3)$  (2). Symbols represent the experimental data while the solid line represents the simulated profile having  $J = -6.74 \text{ cm}^{-1}$ ,  $g = 2.427$  and residual ( $R$ ) =  $1.75 \times 10^{-1}$ .

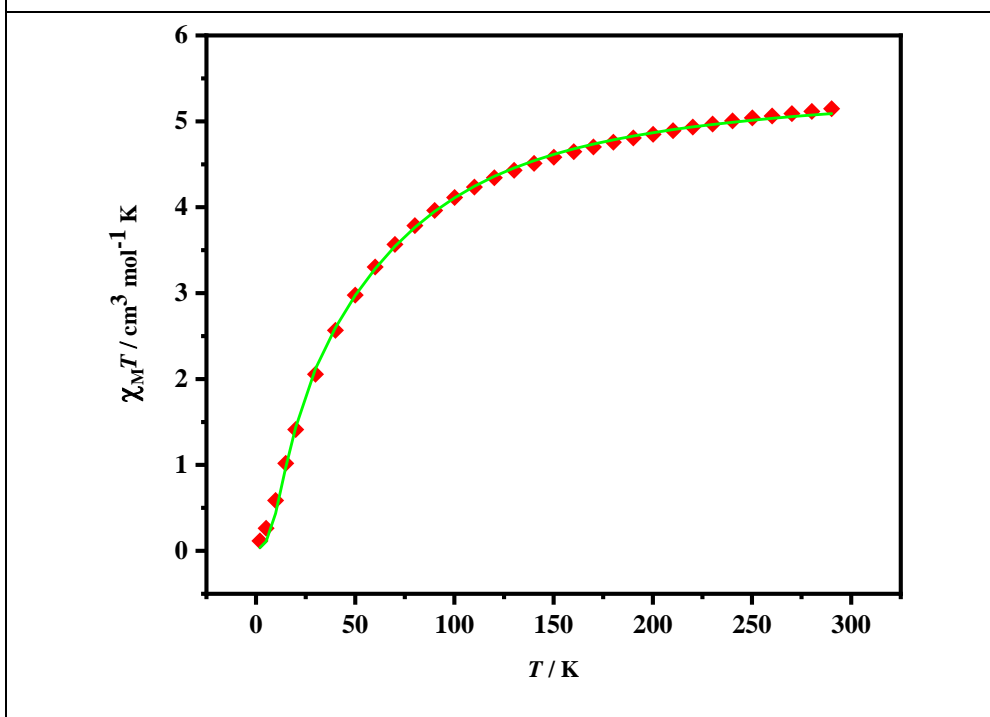

**Fig. S7.**  $\chi_M T$  versus  $T$  plot (at 1 T) for  $[\text{Co}^{\text{II}}_2\text{L}^2(\text{CH}_3\text{OH})(\text{H}_2\text{O})\text{Cl}](\text{NO}_3)$  (2). Symbols represent the experimental data while the solid line represents the simulated profile having  $J = -4.5 \text{ cm}^{-1}$ ,  $g = 2.417$ ,  $D = 69.5 \text{ cm}^{-1}$  and residual ( $R$ ) =  $7.76 \times 10^{-2}$ .

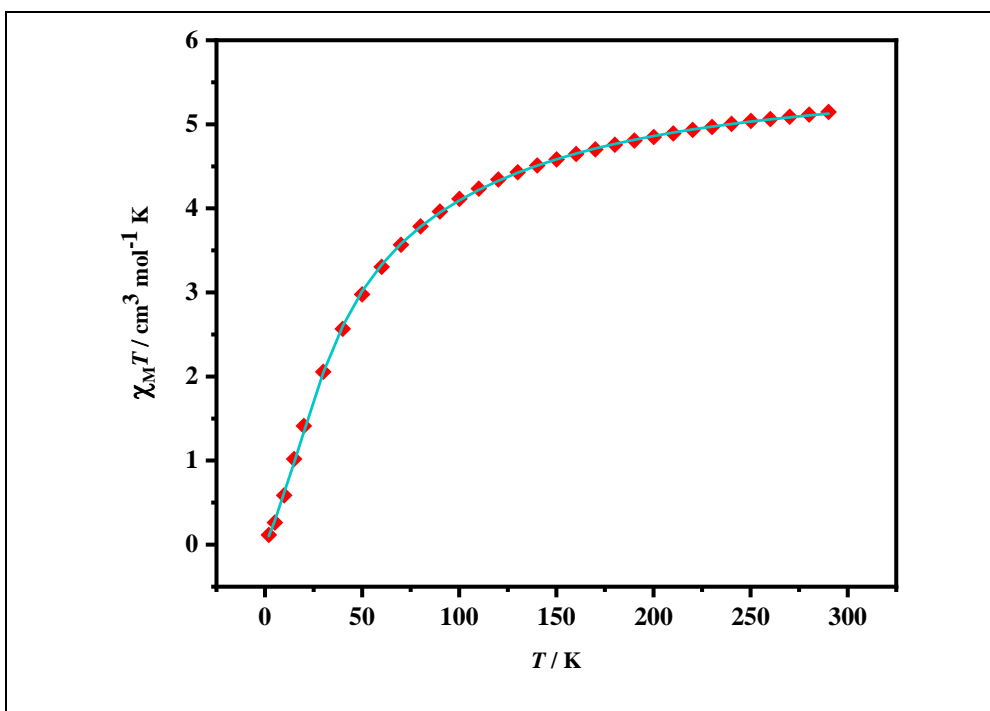

**Fig. S8.**  $\chi_M T$  versus  $T$  plot (at 1 T) for  $[\text{Co}^{\text{II}}_2\text{L}^2(\text{CH}_3\text{OH})(\text{H}_2\text{O})\text{Cl}](\text{NO}_3)$  (2). Symbols represent the experimental data while the solid line represents the simulated profile having  $J = -5.9 \text{ cm}^{-1}$ ,  $g = 2.454$ ,  $D_1 = 121.6 \text{ cm}^{-1}$ ,  $D_2 = 11.1 \text{ cm}^{-1}$  and residual ( $R$ ) =  $1.45 \times 10^{-2}$ .

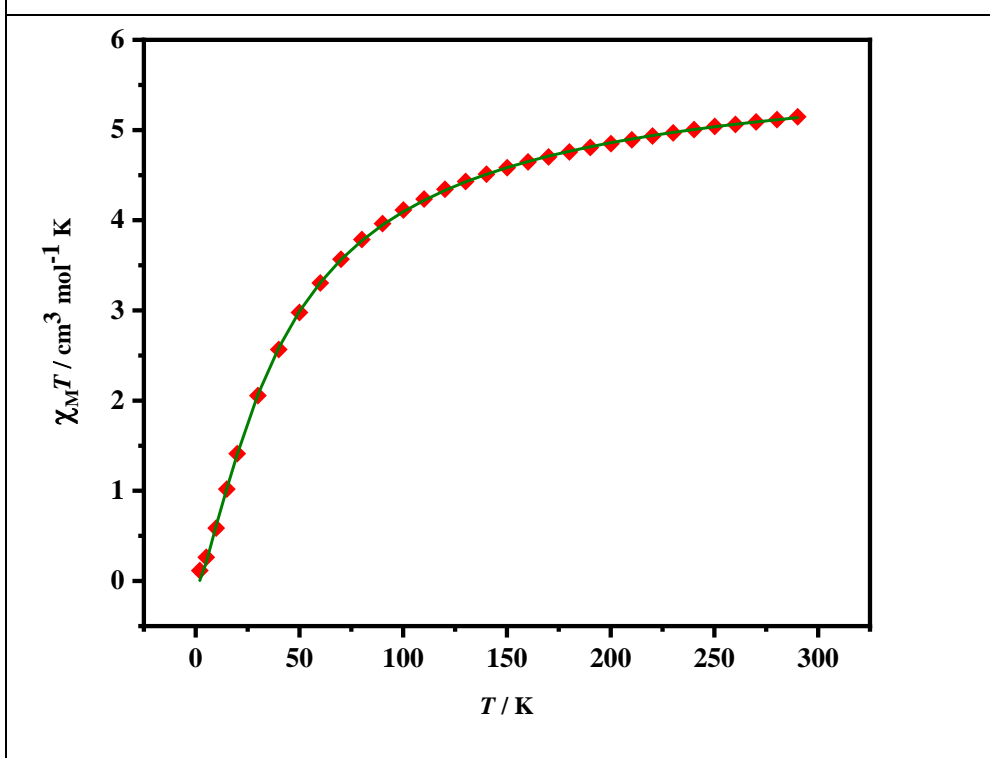

**Fig. S9.**  $\chi_M T$  versus  $T$  plot (at 1 T) for  $[\text{Co}^{\text{II}}_2\text{L}^2(\text{CH}_3\text{OH})(\text{H}_2\text{O})\text{Cl}](\text{NO}_3)$  (2). Symbols represent the experimental data while the solid line represents the simulated profile having  $J = -5.04 \text{ cm}^{-1}$ ,  $g = 2.496$ ,  $zJ' = -0.90 \text{ cm}^{-1}$  and residual ( $R$ ) =  $1.87 \times 10^{-2}$ .

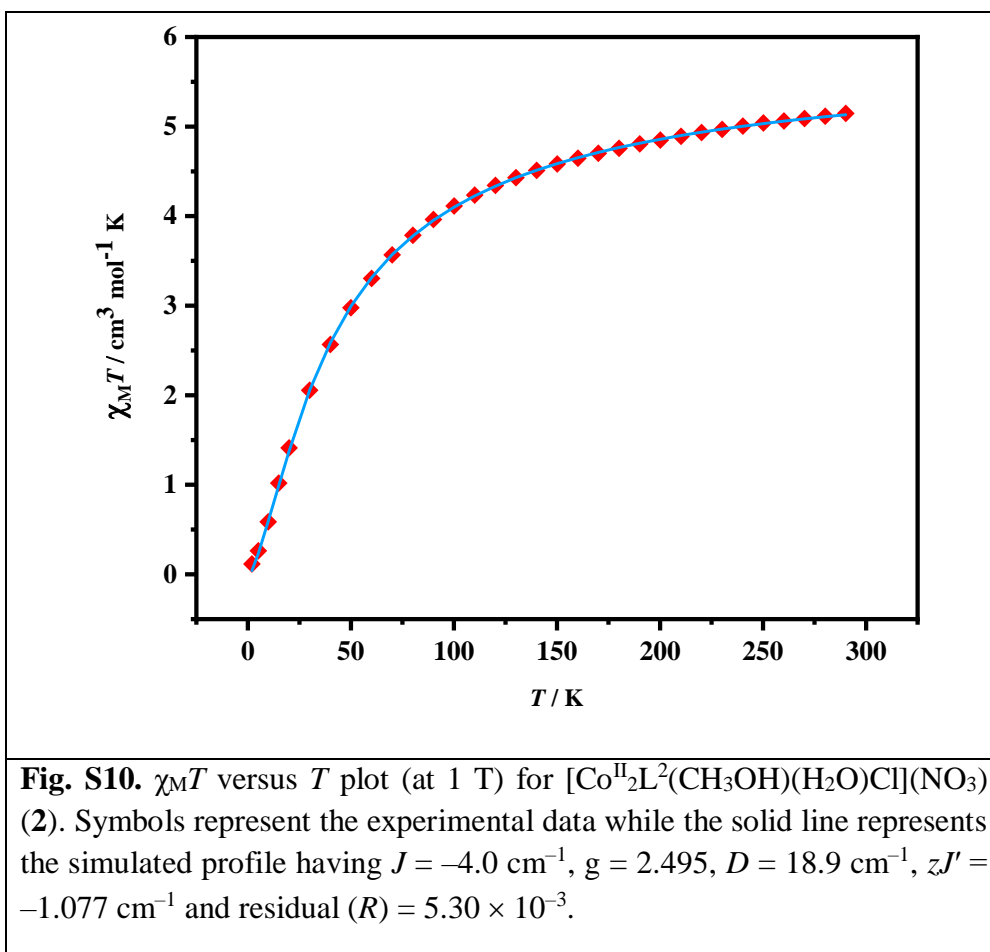

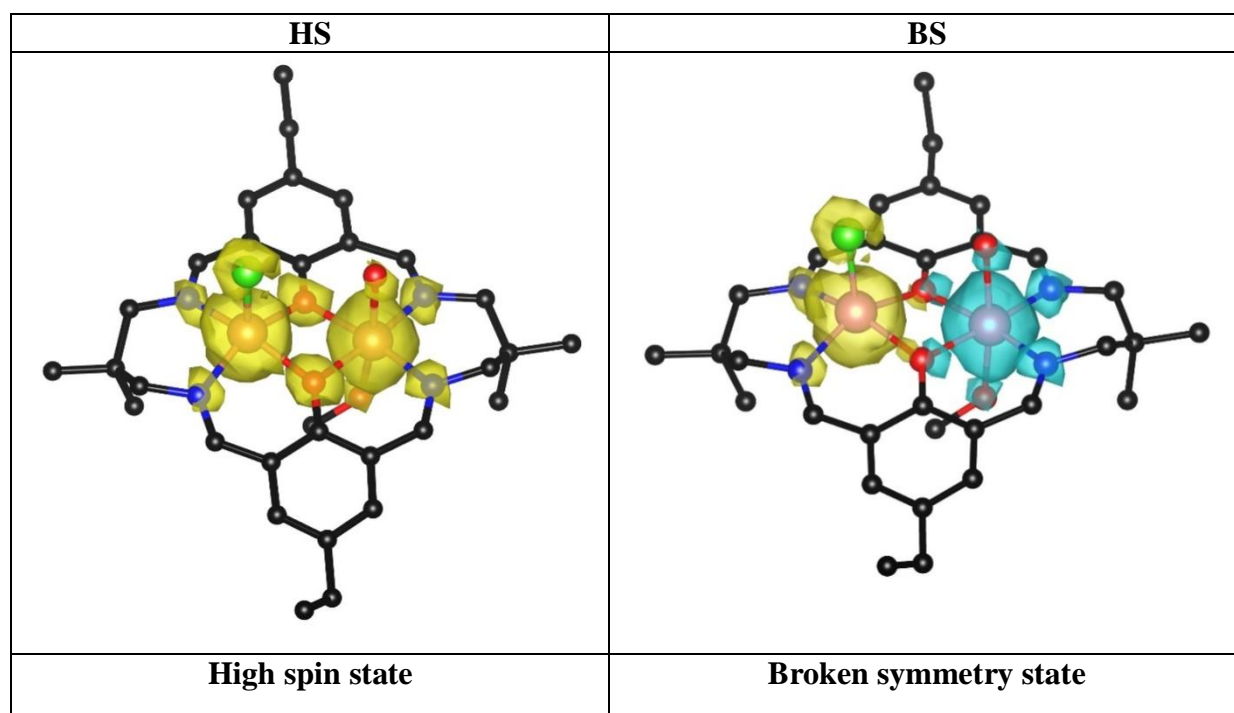

**Fig. S11.** DFT computed spin densities (iso = 0.003) of  $[\text{Co}^{\text{II}}_2\text{L}^2(\text{CH}_3\text{OH})(\text{H}_2\text{O})\text{Cl}](\text{NO}_3)$  (**2**) in two spin states (HS and BS).

**Table S1.** Selected bond lengths (in Å) and bond angles (in °) in the single crystal structure of  $[\text{Mn}^{\text{II}}_2\text{L}^1\text{Cl}_2]$  (**1**).

|             |        |
|-------------|--------|
| Mn1–O1      | 2.1292 |
| Mn1–O1A     | 2.1025 |
| Mn1–N1      | 2.1655 |
| Mn1–N2      | 2.1872 |
| Mn1–Cl1     | 2.3437 |
|             |        |
| Mn1–Mn1A    | 3.307  |
|             |        |
| O1–Mn1–N2   | 141.09 |
| O1A–Mn1–N1  | 145.02 |
| O1A–Mn1–O1  | 77.22  |
| O1A–Mn1–N2  | 85.00  |
| N2–Mn1–N1   | 91.73  |
| O1–Mn1–N1   | 84.02  |
| Cl1–Mn1–O1  | 111.74 |
| Cl1–Mn1–O1A | 113.79 |
| Cl1–Mn1–N1  | 100.49 |
| Cl1–Mn1–N2  | 107.07 |
|             |        |
| Mn1–O1–Mn1A | 102.78 |

**Table S2.** Selected bond lengths (in Å) and bond angles (in °) in the single crystal structure of  $[\text{Co}^{\text{II}}_2\text{L}^2(\text{CH}_3\text{OH})(\text{H}_2\text{O})\text{Cl}](\text{NO}_3)$  (**2**).

|            |        |
|------------|--------|
| Co1–O1     | 2.052  |
| Co1–O2     | 2.044  |
| Co1–N1     | 2.042  |
| Co1–N2     | 2.072  |
| Co1–Cl1    | 2.295  |
|            |        |
| Co2–O1     | 2.037  |
| Co2–O2     | 2.021  |
| Co2–N3     | 2.047  |
| Co2–N4     | 2.028  |
| Co2–O3     | 2.179  |
| Co2–O4     | 2.214  |
|            |        |
| Co1–Co2    | 3.131  |
|            |        |
| O1–Co1–N2  | 154.6  |
| O2–Co1–N1  | 151.3  |
| O1–Co1–N1  | 87.95  |
| N2–Co1–N1  | 95.2   |
| N2–Co1–O2  | 87.40  |
| O1–Co1–O2  | 78.20  |
| Cl1–Co1–O1 | 103.00 |
| Cl1–Co1–O2 | 103.30 |
| Cl1–Co1–N1 | 104.29 |
| Cl1–Co1–N2 | 100.63 |
|            |        |
| N4–Co2–O2  | 169.87 |
| N3–Co2–O1  | 172.98 |
| O3–Co2–O4  | 170.6  |
| N3–Co2–N4  | 95.73  |
| N4–Co2–O1  | 90.90  |
| O1–Co2–O2  | 79.08  |
| N3–Co2–O2  | 94.34  |
| N3–Co2–O3  | 89.5   |
| N4–Co2–O3  | 93.85  |
| O1–Co2–O3  | 92.37  |
| O2–Co2–O3  | 85.13  |
| N3–Co2–O4  | 88.93  |
| N4–Co2–O4  | 95.5   |
| O1–Co2–O4  | 88.14  |
| O2–Co2–O4  | 85.77  |
|            |        |
| Co1–O1–Co2 | 99.95  |
| Co1–O2–Co2 | 100.72 |

**Table S3.** The values of the simulated magnetic parameters for  $[\text{Co}^{\text{II}}_2\text{L}^2(\text{CH}_3\text{OH})(\text{H}_2\text{O})\text{Cl}](\text{NO}_3)$  (**2**) obtained by taking into account  $J$  and  $g$ .

| Sl. No. | $J$ ( $\text{cm}^{-1}$ ) | $g$   | Residual ( $R$ )      |
|---------|--------------------------|-------|-----------------------|
| I       | -6.74                    | 2.427 | $1.75 \times 10^{-1}$ |

**Table S4.** The values of the simulated magnetic parameters for  $[\text{Co}^{\text{II}}_2\text{L}^2(\text{CH}_3\text{OH})(\text{H}_2\text{O})\text{Cl}](\text{NO}_3)$  (**2**) obtained by taking into account  $J$ ,  $g$  and an average  $D$  for the two  $\text{Co}^{\text{II}}$  centres.

| Sl. No. | $J$ ( $\text{cm}^{-1}$ ) | $g$   | $D$ ( $\text{cm}^{-1}$ ) | Residual ( $R$ )      |
|---------|--------------------------|-------|--------------------------|-----------------------|
| I       | -4.0                     | 2.417 | 83.4                     | $1.54 \times 10^{-1}$ |
| II      | -4.2                     | 2.418 | 78.2                     | $1.01 \times 10^{-1}$ |
| III     | -4.3                     | 2.418 | 75.4                     | $8.68 \times 10^{-2}$ |
| IV      | -4.4                     | 2.418 | 72.5                     | $7.92 \times 10^{-2}$ |
| V       | -4.5                     | 2.417 | 69.5                     | $7.76 \times 10^{-2}$ |
| VI      | -4.6                     | 2.417 | 66.4                     | $8.12 \times 10^{-2}$ |
| VII     | -4.7                     | 2.416 | 63.2                     | $8.93 \times 10^{-2}$ |
| VIII    | -5.0                     | 2.414 | 53.4                     | $1.33 \times 10^{-1}$ |
| IX      | -5.5                     | 2.411 | 36.5                     | $2.22 \times 10^{-1}$ |
| X       | -6.0                     | 2.409 | 17.9                     | $2.64 \times 10^{-1}$ |
| XI      | -6.5                     | 2.418 | 4.2                      | $1.90 \times 10^{-1}$ |
| XII     | -6.7                     | 2.425 | 0.003                    | $1.75 \times 10^{-1}$ |
| XIII    | -7.0                     | 2.436 | 0.0002                   | $1.94 \times 10^{-1}$ |

**Table S5.** The values of the simulated magnetic parameters for  $[\text{Co}^{\text{II}}_2\text{L}^2(\text{CH}_3\text{OH})(\text{H}_2\text{O})\text{Cl}](\text{NO}_3)$  (**2**) obtained by taking into account  $J$ ,  $g$  and two distinct  $D$  for the two  $\text{Co}^{\text{II}}$  centres.

| Sl. No. | $J$ ( $\text{cm}^{-1}$ ) | $g$   | $D_1$ ( $\text{cm}^{-1}$ ) | $D_2$ ( $\text{cm}^{-1}$ ) | Residual              |
|---------|--------------------------|-------|----------------------------|----------------------------|-----------------------|
| I       | -4.0                     | 2.417 | 83.4                       | 83.4                       | $1.54 \times 10^{-1}$ |
| II      | -4.5                     | 2.426 | 104.4                      | 50.0                       | $7.12 \times 10^{-2}$ |
| III     | -5.0                     | 2.440 | 126.8                      | 28.2                       | $5.58 \times 10^{-2}$ |
| IV      | -5.8                     | 2.453 | 123.3                      | 12.1                       | $1.57 \times 10^{-2}$ |
| V       | -5.9                     | 2.454 | 121.6                      | 11.1                       | $1.45 \times 10^{-2}$ |
| VI      | -6.0                     | 2.456 | 119.4                      | 10.3                       | $1.62 \times 10^{-2}$ |
| VII     | -6.4                     | 2.453 | 93.2                       | 7.2                        | $4.42 \times 10^{-2}$ |
| VIII    | -6.7                     | 2.423 | 7.7                        | -6.1                       | $1.06 \times 10^{-1}$ |
| IX      | -7.0                     | 2.454 | -65.2                      | -0.45                      | $2.59 \times 10^{-2}$ |
| X       | -7.1                     | 2.453 | -56.9                      | 0.06                       | $3.14 \times 10^{-2}$ |

**Table S6.** The values of the simulated magnetic parameters for  $[\text{Co}^{\text{II}}_2\text{L}^2(\text{CH}_3\text{OH})(\text{H}_2\text{O})\text{Cl}](\text{NO}_3)$  (**2**) obtained by taking into account  $J$ ,  $g$  and  $zJ'$ .

| Sl. No. | $J$ ( $\text{cm}^{-1}$ ) | $g$   | $zJ'$ ( $\text{cm}^{-1}$ ) | Residual ( $R$ )      |
|---------|--------------------------|-------|----------------------------|-----------------------|
| I       | -4.0                     | 2.523 | -1.31                      | $6.30 \times 10^{-2}$ |
| II      | -4.5                     | 2.510 | -1.121                     | $3.15 \times 10^{-2}$ |
| III     | -5.0                     | 2.497 | -0.92                      | $1.88 \times 10^{-2}$ |
| IV      | -5.04                    | 2.496 | -0.90                      | $1.87 \times 10^{-2}$ |
| V       | -5.1                     | 2.494 | -0.88                      | $1.88 \times 10^{-2}$ |
| VI      | -5.5                     | 2.483 | -0.72                      | $2.76 \times 10^{-2}$ |
| VII     | -6.0                     | 2.469 | -0.49                      | $5.90 \times 10^{-2}$ |

**Table S7.** The values of the simulated magnetic parameters for  $[\text{Co}^{\text{II}}_2\text{L}^2(\text{CH}_3\text{OH})(\text{H}_2\text{O})\text{Cl}](\text{NO}_3)$  (**2**) obtained by taking into account  $J$ ,  $g$ , an average  $D$  for the two  $\text{Co}^{\text{II}}$  centres, and  $zJ'$

| Sl. No. | $J$ ( $\text{cm}^{-1}$ ) | $g$   | $D$ ( $\text{cm}^{-1}$ ) | $zJ'$ ( $\text{cm}^{-1}$ ) | Residual ( $R$ )      |
|---------|--------------------------|-------|--------------------------|----------------------------|-----------------------|
| I       | -3.5                     | 2.498 | 25.3                     | -1.170                     | $1.33 \times 10^{-2}$ |
| II      | -3.9                     | 2.494 | 20.9                     | -1.083                     | $5.36 \times 10^{-3}$ |
| III     | -4.0                     | 2.495 | 18.9                     | -1.077                     | $5.30 \times 10^{-3}$ |
| IV      | -4.1                     | 2.496 | 16.8                     | -1.072                     | $5.57 \times 10^{-3}$ |
| V       | -4.5                     | 2.498 | 10.1                     | -1.023                     | $6.79 \times 10^{-3}$ |
| VI      | -5.0                     | 2.492 | 5.8                      | -883                       | $1.06 \times 10^{-2}$ |

**Table S8.** The values of the simulated magnetic parameters for  $[\text{Co}^{\text{II}}_2\text{L}^2(\text{CH}_3\text{OH})(\text{H}_2\text{O})\text{Cl}](\text{NO}_3)$  (**2**) obtained by taking into account  $J$ ,  $g$ , distinct  $D$  for the two  $\text{Co}^{\text{II}}$  centres, and  $zJ'$

| Sl. No. | $J$ ( $\text{cm}^{-1}$ ) | $g$   | $D_1$ ( $\text{cm}^{-1}$ ) | $D_2$ ( $\text{cm}^{-1}$ ) | $zJ'$ ( $\text{cm}^{-1}$ ) | Residual              |
|---------|--------------------------|-------|----------------------------|----------------------------|----------------------------|-----------------------|
| I       | -3.5                     | 2.498 | 25.2                       | 25.2                       | -1.17                      | $1.29 \times 10^{-2}$ |
| II      | -3.8                     | 2.494 | 22.4                       | 22.4                       | -1.09                      | $5.91 \times 10^{-3}$ |
| III     | -4.0                     | 2.494 | -38.3                      | -6.0                       | -1.05                      | $4.92 \times 10^{-3}$ |
| IV      | -4.3                     | 2.484 | 37.8                       | 11.9                       | -0.91                      | $4.11 \times 10^{-3}$ |
| V       | -4.5                     | 2.498 | -17.4                      | -4.1                       | -1.02                      | $5.28 \times 10^{-3}$ |
| VI      | -5.0                     | 2.491 | 13.4                       | 3.4                        | -0.87                      | $7.16 \times 10^{-3}$ |
| VII     | -5.5                     | 2.480 | 15.9                       | 1.5                        | -0.68                      | $1.23 \times 10^{-2}$ |

**Table S9.** Continuous Shape measures calculation for  $[\text{Mn}^{\text{II}}\text{L}^1\text{Cl}_2]$  (**1**) and  $[\text{Co}^{\text{II}}\text{L}^2(\text{CH}_3\text{OH})(\text{H}_2\text{O})\text{Cl}](\text{NO}_3)$  (**2**) obtained using SHAPE.

| Compound | Metal Centre | Coordination Number | Pentagon ( $\text{D}_{5\text{h}}$ ) | Vacant octahedron ( $\text{C}_{4\text{v}}$ )  | Trigonal bipyramid ( $\text{D}_{3\text{h}}$ ) | Spherical square pyramid ( $\text{C}_{4\text{v}}$ ) | Johnson trigonal bipyramid $\text{J12}(\text{D}_{3\text{h}})$ |
|----------|--------------|---------------------|-------------------------------------|-----------------------------------------------|-----------------------------------------------|-----------------------------------------------------|---------------------------------------------------------------|
| <b>1</b> | Mn           | 5                   | 29.869                              | 4.007                                         | 5.236                                         | <b>0.866</b>                                        | 9.191                                                         |
| <b>2</b> | Co1          | 5                   | 31.437                              | 2.453                                         | 5.031                                         | <b>0.436</b>                                        | 8.285                                                         |
|          |              | Coordination Number | Hexagon ( $\text{D}_{6\text{h}}$ )  | Pentagonal pyramid ( $\text{C}_{5\text{v}}$ ) | Octahedron ( $\text{O}_\text{h}$ )            | Trigonal prism ( $\text{D}_{3\text{h}}$ )           | Johnson pentagonal pyramid $\text{J2}(\text{C}_{5\text{v}})$  |
|          | Co2          | 6                   | 32.412                              | 26.360                                        | <b>0.557</b>                                  | 14.179                                              | 30.280                                                        |

**Table S10.** The geometries of the hydrogen bonds in the supramolecular topologies of  $[\text{Mn}^{\text{II}}_2\text{L}^1\text{Cl}_2]$  (**1**) and  $[\text{Co}^{\text{II}}_2\text{L}^2(\text{CH}_3\text{OH})(\text{H}_2\text{O})\text{Cl}](\text{NO}_3)$  (**2**) (distances in Å and angles are in °). Symmetry in **1**: C, 2-x, 0.5+y, 0.5-z. Symmetry in **2**: E, -0.5+x, 1.5-y, z.

|          | D-H...A        | D...A | H...A | D-H...A |
|----------|----------------|-------|-------|---------|
| <b>1</b> | C5-H5...Cl1C   | 3.580 | 2.788 | 146.03  |
|          | C8-H8...Cl1C   | 3.662 | 2.824 | 139.76  |
| <b>2</b> | C30-H30A...O7E | 3.429 | 2.489 | 158.60  |
|          | C31-H31C...O7  | 3.170 | 2.388 | 136.38  |
|          | O4-H4...O7     | 3.295 | 2.613 | 134.97  |
|          | O4-H4...O5     | 2.771 | 1.894 | 173.74  |
|          | O3-H3A...O6E   | 2.801 | 2.000 | 152.41  |
|          | O3-H3B...Cl1   | 3.218 | 2.428 | 151.13  |

**Table S11.** Shortest intermolecular metal-metal separations (in Å) in  $[\text{Mn}^{\text{II}}_2\text{L}^1\text{Cl}_2]$  (**1**) and  $[\text{Co}^{\text{II}}_2\text{L}^2(\text{CH}_3\text{OH})(\text{H}_2\text{O})\text{Cl}](\text{NO}_3)$  (**2**). Atom labels correspond to the contacts, shown in Figs. 2 and 3 in main text.

| <b>1</b>      |        | <b>2</b>     |        |
|---------------|--------|--------------|--------|
| Mn1-----Mn1B  | 8.650  | Co1-----Co1D | 13.051 |
| Mn1-----Mn1E  | 10.266 | Co1-----Co2D | 10.836 |
| Mn1A-----Mn1B | 7.678  | Co2-----Co1D | 12.150 |
| Mn1A-----Mn1E | 9.790  | Co2-----Co2D | 10.072 |

**Table S12:** Crystallographic Data for **1** and **2**.

| Compound                                                                                         | <b>1</b>                                                                                      | <b>2</b>                                                                        |
|--------------------------------------------------------------------------------------------------|-----------------------------------------------------------------------------------------------|---------------------------------------------------------------------------------|
| Empirical formula                                                                                | C <sub>28</sub> H <sub>34</sub> N <sub>4</sub> O <sub>2</sub> Cl <sub>2</sub> Mn <sub>2</sub> | C <sub>31</sub> H <sub>44</sub> N <sub>5</sub> O <sub>7</sub> ClCo <sub>2</sub> |
| Formula weight                                                                                   | 639.37                                                                                        | 752.02                                                                          |
| Crystal system                                                                                   | monoclinic                                                                                    | Orthorhombic                                                                    |
| Space group                                                                                      | <i>P2(1)/c</i>                                                                                | <i>Pna21</i>                                                                    |
| <i>a</i> (Å)                                                                                     | 9.7907(6)                                                                                     | 18.357(10)                                                                      |
| <i>b</i> (Å)                                                                                     | 11.7780(7)                                                                                    | 11.122(5)                                                                       |
| <i>c</i> (Å)                                                                                     | 13.2080(8)                                                                                    | 16.532(7)                                                                       |
| $\alpha$ (°)                                                                                     | 90.00                                                                                         | 90                                                                              |
| $\beta$ (°)                                                                                      | 110.505(2)                                                                                    | 90                                                                              |
| $\gamma$ (°)                                                                                     | 90.00                                                                                         | 90                                                                              |
| <i>V</i> (Å <sup>3</sup> )                                                                       | 1426.58(15)                                                                                   | 3375(3)                                                                         |
| <i>Z</i>                                                                                         | 2                                                                                             | 4                                                                               |
| <i>D</i> (calculated, g cm <sup>-3</sup> )                                                       | 1.488                                                                                         | 1.480                                                                           |
| $\lambda$ (Mo K $\alpha$ ), Å                                                                    | 0.71073                                                                                       | 0.71073                                                                         |
| $\mu$ (mm <sup>-1</sup> )                                                                        | 1.105                                                                                         | 1.115                                                                           |
| <i>T</i> (K)                                                                                     | 296(2)                                                                                        | 160(2)                                                                          |
| <i>F</i> (000)                                                                                   | 660                                                                                           | 1568                                                                            |
| $2\theta$ range for data collection (°)                                                          | 4.44–54.90                                                                                    | 4.414–59.232                                                                    |
| Index ranges                                                                                     | $-12 \leq h \leq 11$                                                                          | $-25 \leq h \leq 25$                                                            |
|                                                                                                  | $-15 \leq k \leq 15$                                                                          | $-15 \leq k \leq 15$                                                            |
|                                                                                                  | $-17 \leq l \leq 16$                                                                          | $-16 \leq l \leq 22$                                                            |
| No. measured reflections                                                                         | 19174                                                                                         | 44280                                                                           |
| No. independent reflections                                                                      | 3219                                                                                          | 7996                                                                            |
| <i>R</i> <sub>int</sub>                                                                          | 0.0463                                                                                        | 0.0882                                                                          |
| No. refined parameters                                                                           | 240                                                                                           | 426                                                                             |
| No. observed reflections, $I \geq 2\sigma(I)$                                                    | 2556                                                                                          | 6409                                                                            |
| <i>R</i> <sub>1</sub> <sup>a</sup> , <i>wR</i> <sub>2</sub> <sup>b</sup> [ $I \geq 2\sigma(I)$ ] | 0.03096, 0.0668                                                                               | 0.0505, 0.1281                                                                  |
| <i>R</i> <sub>1</sub> <sup>a</sup> , <i>wR</i> <sub>2</sub> <sup>b</sup> [all data]              | 0.0466, 0.0725                                                                                | 0.0755, 0.1570                                                                  |

$${}^a R_1 = [\sum ||F_o| - |F_c|| / \sum |F_o|]. \quad {}^b wR_2 = [\sum w(F_o^2 - F_c^2)^2 / \sum w(F_o^2)^2]^{1/2}$$
